# Supplementary material for: Genomic Epidemiology of Salmonella enterica Serotype Enteritidis based on Population Structure of Prevalent Lineages
Source: PubMed Central journal article supplement (PMC4178404; doi:10.3201/eid2009.131095), 2014-09
Supplement: 13-1095-Techapp-s1.pdf [file 13-1095-Techapp-s1.pdf]

# Genomic Epidemiology of *Salmonella enterica* Serotype Enteritidis based on Population Structure of Prevalent Lineages

## Technical Appendix

Technical Appendix Table 1. Isolates used in this study\*

| Isolate†          | Serotype    | Location             | PFGE-XbaI‡  | Year | Source                  | Sequencer |
|-------------------|-------------|----------------------|-------------|------|-------------------------|-----------|
| 2009K-0477 (1)    | Enteritidis | Uganda               | JEGX01.0767 | 2009 | Human                   | Illumina  |
| 2009K-0479 (2)    | Enteritidis | Uganda               | JEGX01.0767 | 2009 | Human                   | Illumina  |
| 77320 (3)         | Enteritidis | Western USA          | JEGX01.0031 | 2004 | Animal (deer)           | Illumina  |
| 81748 (4)         | Enteritidis | Western, USA         | JEGX01.0048 | 2005 | Animal (wild mammal)    | Illumina  |
| 04-0307 (5)       | Enteritidis | Arizona, USA         | NA          | 2004 | Almond processing plant | Illumina  |
| J0915 (6)         | Enteritidis | California, USA      | NA          | 2001 | Environment (drag swab) | Illumina  |
| J0903 (7)         | Enteritidis | California, USA      | NA          | 2001 | Environment (drag swab) | Illumina  |
| J0828 (8)         | Enteritidis | NA                   | NA          | 2001 | Human                   | Illumina  |
| UC12 (9)          | Enteritidis | California, USA      | NA          | 2002 | Human blood             | Illumina  |
| 0811210F (10)     | Enteritidis | California, USA      | NA          | 2008 | Animal (sea lion)       | Illumina  |
| 9810102B (11)     | Enteritidis | California, USA      | NA          | 1998 | Animal (sea otter)      | Illumina  |
| 502571 (12)       | Enteritidis | California, USA      | NA          | 2005 | Animal (sea lion)       | Illumina  |
| CDC-STK-1280 (13) | Nitra       | Slovakia             | NA          | 1965 | NA                      | Illumina  |
| P125109 (14)      | Enteritidis | United Kingdom       | NA          | 1988 | Human                   | Reference |
| 2010K-0303 (15)   | Enteritidis | Thailand             | JEGX01.0158 | 2008 | Human feces             | Illumina  |
| 2010K-0271 (16)   | Enteritidis | Thailand             | JEGX01.0008 | 2008 | Human blood             | Illumina  |
| 2010K-0284 (17)   | Enteritidis | Thailand             | JEGX01.0167 | 2008 | Human blood             | Illumina  |
| 2010K-0297 (18)   | Enteritidis | Thailand             | JEGX01.0002 | 2008 | Human feces             | Illumina  |
| 2010K-0264 (19)   | Enteritidis | Thailand             | JEGX01.0019 | 2008 | Human blood             | Illumina  |
| 2010K-0302 (20)   | Enteritidis | Thailand             | JEGX01.0158 | 2008 | Human blood             | Illumina  |
| 2010K-0263 (21)   | Enteritidis | Thailand             | JEGX01.0002 | 2008 | Human blood             | Illumina  |
| 2010K-0277 (22)   | Enteritidis | Thailand             | JEGX01.0002 | 2008 | Human feces             | Illumina  |
| 2010K-0286 (23)   | Enteritidis | Thailand             | JEGX01.0019 | 2008 | Human blood             | Illumina  |
| 2010K-0268 (24)   | Enteritidis | Thailand             | JEGX01.0158 | 2008 | Human blood             | Illumina  |
| 2010K-0301 (25)   | Enteritidis | Thailand             | JEGX01.0158 | 2008 | Human feces             | Illumina  |
| 2010K-0313 (26)   | Enteritidis | Mauritius            | JEGX01.0004 | 2010 | Human blood             | Illumina  |
| 2010K-0329 (27)   | Enteritidis | Mauritius            | JEGX01.0004 | 2010 | Human feces             | Illumina  |
| 2009K-1324 (28)   | Enteritidis | Kansas, USA          | NA          | 2009 | Human                   | Illumina  |
| 2010K-0287 (29)   | Enteritidis | Thailand             | JEGX01.0167 | 2008 | Human feces             | Illumina  |
| 2010K-0300 (30)   | Enteritidis | Thailand             | JEGX01.0019 | 2008 | Human blood             | Illumina  |
| UC11 (31)         | Enteritidis | California, USA      | NA          | 2001 | Human blood             | Illumina  |
| 2010K-0267 (32)   | Enteritidis | Thailand             | JEGX01.0019 | 2008 | Human blood             | Illumina  |
| UC13 (33)         | Enteritidis | California, USA      | NA          | 2009 | Human blood             | Illumina  |
| 96-0186 (34)      | Nitra       | California, USA      | NA          | 1996 | Human urine             | Illumina  |
| 61979 (35)        | Enteritidis | Northern plains, USA | JEGX01.0002 | 2002 | Food ready-to-eat       | Illumina  |
| 98-0467 (36)      | Enteritidis | Wyoming, USA         | NA          | 1998 | Human blood             | Illumina  |
| UC06 (37)         | Enteritidis | NA                   | NA          | 2004 | Human blood             | Illumina  |
| UC02 (38)         | Enteritidis | California, USA      | NA          | 2004 | Human feces             | Illumina  |
| UC10 (39)         | Enteritidis | California, USA      | NA          | 2004 | Human                   | Illumina  |
| UC03 (40)         | Enteritidis | California, USA      | NA          | 2005 | Human                   | Illumina  |
| 2009K-1726 (41)   | Enteritidis | Maryland, USA        | JEGX01.0009 | 2009 | Human                   | Illumina  |
| 56-3991 (42) [C8] | Enteritidis | Tennessee, USA       | NA          | 1956 | Human                   | Roche 454 |
| 62-1976 (43) [C8] | Enteritidis | Massachusetts, USA   | NA          | 1962 | Human                   | Roche 454 |
| 2010K-0860 (44)   | Nitra       | Maryland, USA        | NA          | 2010 | Human feces             | Illumina  |
| 93-0063 (45)      | Enteritidis | Puerto Rico          | NA          | 1993 | Human feces             | Illumina  |
| 2010K-2029 (46)   | Enteritidis | Illinois, USA        | JEGX01.0002 | 2010 | Human                   | Illumina  |
| 2010K-0345 (47)   | Enteritidis | Mauritius            | JEGX01.0004 | 2010 | Human brain abscess     | Illumina  |
| 2010K-1923 (48)   | Enteritidis | Maryland, USA        | JEGX01.0004 | 2010 | Human                   | Illumina  |
| 2010K-0351 (49)   | Enteritidis | Mauritius            | JEGX01.0004 | 2010 | Human feces             | Illumina  |

| Isolate†              | Serotype    | Location             | PFGE-XbaI‡  | Year | Source                    | Sequencer |
|-----------------------|-------------|----------------------|-------------|------|---------------------------|-----------|
| 50-3079 (50) [C7]     | Enteritidis | New Jersey, USA      | NA          | 1950 | NA                        | Roche 454 |
| 61080 (51)            | Enteritidis | Northern plains, USA | JEGX01.0004 | 2002 | Animal (cow)              | Illumina  |
| 75788 (52)            | Enteritidis | Northern plains, USA | JEGX01.0003 | 2004 | Animal (reptile)          | Illumina  |
| 08-1080 (53)          | Enteritidis | New Mexico, USA      | JEGX01.0030 | 2008 | Human feces               | Illumina  |
| 82631 (54)            | Enteritidis | Southeastern, USA    | JEGX01.0111 | 2006 | Food (chicken)            | Illumina  |
| 2010K-1832 (55)       | Enteritidis | Oregon, USA          | JEGX01.0005 | 2010 | Human                     | Illumina  |
| 0804789B (56)         | Enteritidis | California, USA      | NA          | 2008 | Animal (elephant seal)    | Illumina  |
| 78296 (57)            | Enteritidis | Northern plains, USA | JEGX01.0030 | 2005 | Food (chicken)            | Illumina  |
| S-277 (58)            | Enteritidis | NA                   | JEGX01.0005 | 2008 | Environment (scald water) | Illumina  |
| 53-0407 (59) [C6]     | Enteritidis | California, USA      | NA          | 1953 | Food (turkey)             | Roche 454 |
| 98-9534 (60)          | Enteritidis | California, USA      | NA          | 1998 | Animal (dog)              | Illumina  |
| 1102933A (61)         | Enteritidis | California, USA      | NA          | 2011 | Animal (elephant seal)    | Illumina  |
| 77-2659 (62) [C3]     | Enteritidis | South Dakota, USA    | NA          | 1977 | Human                     | Roche 454 |
| 93-7741 (63)          | Enteritidis | California, USA      | NA          | 1993 | Animal (horse)            | Illumina  |
| 02-2966 (64)          | Enteritidis | California, USA      | NA          | 2002 | Animal (rodent)           | Illumina  |
| 76-2651 (65) [C4]     | Enteritidis | Maryland, USA        | NA          | 1976 | Human                     | Roche 454 |
| 54-2220 (66)          | Enteritidis | Illinois, USA        | NA          | 1954 | Human feces               | Illumina  |
| 78-1757 (67) [C5]     | Enteritidis | Nebraska, USA        | NA          | 1978 | Human                     | Roche 454 |
| 50-5646 (68) [C3]     | Enteritidis | Texas, USA           | NA          | 1950 | NA                        | Roche 454 |
| 77-0424 (69) [C3]     | Enteritidis | Arizona, USA         | NA          | 1977 | Human                     | Roche 454 |
| 81-2490 (70) [C3]     | Enteritidis | New Jersey, USA      | NA          | 1981 | Human                     | Roche 454 |
| 84-1226 (71)          | Enteritidis | New York, USA        | NA          | 1984 | Human urine               | Illumina  |
| 35986 (72)            | Enteritidis | NA                   | JEGX01.0021 | 1998 | Food (chicken)            | Illumina  |
| 81-2625 (73) [C3]     | Enteritidis | New Mexico, USA      | NA          | 1981 | Human                     | Roche 454 |
| 39997 (74)            | Enteritidis | Southeastern, USA    | JEGX01.0037 | 1999 | Food (chicken)            | Illumina  |
| 76-3618 (75) [C3]     | Enteritidis | Arizona, USA         | NA          | 1976 | Human                     | Roche 454 |
| 76-0331 (76)          | Enteritidis | Saudi Arabia         | NA          | 1976 | Human feces               | Illumina  |
| 69-4941 (77) [C3]     | Enteritidis | New Hampshire, USA   | NA          | 1969 | Human                     | Roche 454 |
| 77-1427 (78) [C3]     | Enteritidis | Rhode Island, USA    | NA          | 1977 | Human                     | Roche 454 |
| 75-2732 (79)          | Enteritidis | New Hampshire, USA   | NA          | 1975 | Human feces               | Illumina  |
| 93-2836A (80)         | Enteritidis | California, USA      | NA          | 1993 | Animal (elephant seal)    | Illumina  |
| 93-6175B (81)         | Enteritidis | California, USA      | NA          | 1993 | Animal (sea lion)         | Illumina  |
| 93-7922A (82)         | Enteritidis | California, USA      | NA          | 1993 | Animal (elephant seal)    | Illumina  |
| 55795(83)             | Enteritidis | Southeastern, USA    | JEGX01.0005 | 2001 | Food (chicken)            | Illumina  |
| 60277 (84)            | Enteritidis | Northeastern USA     | JEGX01.0004 | 2002 | Food (egg yolks)          | Illumina  |
| 2010K-1543 (85) [C1]  | Enteritidis | California, USA      | JEGX01.0004 | 2010 | Human                     | Roche 454 |
| 2010K-1445 (86) [C1]  | Enteritidis | California, USA      | JEGX01.0004 | 2010 | Human                     | Roche 454 |
| 2010K-1882 (87) [C1]  | Enteritidis | Colorado, USA        | JEGX01.0005 | 2010 | Human                     | Roche 454 |
| 2010K-1884 (88) [C1]  | Enteritidis | Colorado, USA        | JEGX01.0004 | 2010 | Food ready-to-eat         | Roche 454 |
| 2010K-0895 (89) [C1]  | Enteritidis | Ohio, USA            | JEGX01.0004 | 2010 | Human                     | Roche 454 |
| 2010K-0968 (90) [C1]  | Enteritidis | Ohio, USA            | JEGX01.0004 | 2010 | Human                     | Roche 454 |
| 2010K-1028 (91)       | Enteritidis | Ohio, USA            | JEGX01.0004 | 2010 | Human                     | Illumina  |
| 2010K-0899 (92) [C1]  | Enteritidis | Ohio, USA            | JEGX01.0004 | 2010 | Food ready-to-eat         | Roche 454 |
| 2010K-0956 (93) [C1]  | Enteritidis | Ohio, USA            | JEGX01.0004 | 2010 | Human                     | Roche 454 |
| 2010K-1594 (94) [C1]  | Enteritidis | California, USA      | JEGX01.0004 | 2010 | Human                     | Roche 454 |
| 2010K-1725 (95) [C1]  | Enteritidis | Nevada, USA          | JEGX01.0004 | 2010 | Human                     | Roche 454 |
| 2010K-1558 (96) [C1]  | Enteritidis | Iowa, USA            | JEGX01.0004 | 2010 | Human                     | Roche 454 |
| 2010K-1747 (97) [C1]  | Enteritidis | Wisconsin, USA       | JEGX01.0004 | 2010 | Human                     | Roche 454 |
| 2010K-1745 (98) [C1]  | Enteritidis | Wisconsin, USA       | JEGX01.0004 | 2010 | Human                     | Roche 454 |
| 2010K-1729 (99) [C1]  | Enteritidis | Nevada, USA          | JEGX01.0004 | 2010 | Human                     | Roche 454 |
| 2010K-1808 (100) [C1] | Enteritidis | Texas, USA           | JEGX01.0004 | 2010 | Human                     | Roche 454 |
| 2010K-1810 (101) [C1] | Enteritidis | Texas, USA           | JEGX01.0004 | 2010 | Human                     | Roche 454 |
| 2010K-1444 (102) [C1] | Enteritidis | California, USA      | JEGX01.0004 | 2010 | Human                     | Roche 454 |
| 2010K-1559 (103) [C1] | Enteritidis | Iowa, USA            | JEGX01.0004 | 2010 | Human                     | Roche 454 |
| 2010K-1811 (104) [C1] | Enteritidis | Texas, USA           | JEGX01.0004 | 2010 | Human                     | Roche 454 |
| 2009K-0958 (105)      | Enteritidis | Massachusetts, USA   | JEGX01.0021 | 2009 | Human                     | Illumina  |
| 85366 (106)           | Enteritidis | Western USA          | JEGX01.0021 | 2007 | Food (ground chicken)     | Illumina  |
| 2010K-1575 (107) [C2] | Enteritidis | Minnesota, USA       | JEGX01.0004 | 2010 | Human                     | Roche 454 |
| 98961 (108)           | Enteritidis | Southeastern USA     | JEGX01.0004 | 2010 | Food (chicken)            | Illumina  |
| 97569 (109)           | Enteritidis | Northern plains, USA | JEGX01.0004 | 2010 | Food (ground chicken)     | Illumina  |
| 2010K-1565 (110) [C2] | Enteritidis | Minnesota, USA       | JEGX01.0004 | 2010 | Human                     | Roche 454 |
| 2010K-1566 (111) [C2] | Enteritidis | Minnesota, USA       | JEGX01.0004 | 2010 | Human                     | Roche 454 |
| 2010K-1580 (112) [C2] | Enteritidis | Minnesota, USA       | JEGX01.0004 | 2010 | Human                     | Roche 454 |
| 2010K-1441 (113) [C2] | Enteritidis | California, USA      | JEGX01.0004 | 2010 | Human                     | Roche 454 |
| S-380 (114)           | Enteritidis | NA                   | JEGX01.0003 | 2008 | Environment (foam)        | Illumina  |
| 2010K-1369 (115)      | Enteritidis | Iowa, USA            | JEGX01.0034 | 2010 | Human feces               | Illumina  |

| Isolate†              | Serotype    | Location            | PFGE-XbaI‡  | Year | Source             | Sequencer   |
|-----------------------|-------------|---------------------|-------------|------|--------------------|-------------|
| 0701376-4 (116)       | Enteritidis | California, USA     | NA          | 2007 | Animal (sea otter) | Illumina    |
| 2010K-1457 (117) [C2] | Enteritidis | Pennsylvania, USA   | JEGX01.0004 | 2010 | Human              | Roche 454   |
| 2010K-1455 (118) [C2] | Enteritidis | Pennsylvania, USA   | JEGX01.0004 | 2010 | Human              | Roche 454   |
| 2010K-0262 (119)      | Enteritidis | Thailand            | JEGX01.0019 | 2008 | Human feces        | Illumina    |
| 2010K-1010 (120) [C2] | Enteritidis | North Carolina, USA | JEGX01.0108 | 2010 | Food ready-to-eat  | Roche 454   |
| 2010K-1018 (121) [C2] | Enteritidis | North Carolina, USA | JEGX01.0004 | 2010 | Human              | Roche 454   |
| 2010K-1554 (122)      | Enteritidis | Iowa, USA           | JEGX01.0004 | 2010 | Human              | Illumina    |
| 2009K-1651 (123)      | Enteritidis | California, USA     | JEGX01.0034 | 2009 | Human              | Illumina    |
| 2010K-1795 (124) [C2] | Enteritidis | Tennessee, USA      | JEGX01.0004 | 2010 | Human              | Roche 454   |
| 2010K-1791 (125) [C2] | Enteritidis | Tennessee, USA      | JEGX01.0004 | 2010 | Human              | Roche 454   |
| 77-0915§              | Enteritidis | New Zealand         | NA          | 1977 | NA                 | Illumina    |
| 07-0056§              | Enteritidis | Minnesota, USA      | NA          | 2006 | Human blood        | Illumina    |
| SARB17§               | Enteritidis | Brazil              | NA          | NA   | NA                 | 454/Sanger¶ |
| SARB19§               | Enteritidis | Switzerland         | NA          | NA   | NA                 | Illumina¶   |

\*PFGE, pulsed-field gel electrophoresis; NA, not available.

†Isolates are numbered (in parenthesis) from the top down as they appear on the 125-isolate tree in Figure 1. For each 454 sequenced isolate also analyzed in (12), its cluster affiliation is noted in brackets as defined in (12).‡PulseNet PFGE pattern names might be subject to change.

§Genetically divergent isolates that are excluded from phylogenetic analysis.

¶Desai PT, Porwollik S, Long F, Cheng P, Wollam A, Bhonagiri-Palsikar V, et al. Evolutionary genomics of *Salmonella enterica* subspecies. mBio. 2013;4:e00198-13.

Technical Appendix Table 2. New genomes sequenced for this study

| Isolate    | GenBank accession no. | Sequencing coverage |
|------------|-----------------------|---------------------|
| UC07       | PRJNA168935           | 64.5x               |
| 07-0056    | PRJNA168933           | 61.2x               |
| 60277      | PRJNA168942           | 64.8x               |
| 97569      | PRJNA168772           | 63.6x               |
| 85366      | PRJNA168767           | 55.6x               |
| 61979      | PRJNA168769           | 64.3x               |
| 98961      | PRJNA168768           | 97.6x               |
| 78296      | PRJNA168766           | 57.4x               |
| 82631      | PRJNA168792           | 66.7x               |
| 81748      | PRJNA168793           | 99.0x               |
| 77320      | PRJNA168794           | 90.1x               |
| 61080      | PRJNA168770           | 75.2x               |
| 39997      | PRJNA168791           | 64.0x               |
| 55795      | PRJNA168764           | 77.0x               |
| 34986      | PRJNA168771           | 88.8x               |
| 2010K-0313 | PRJNA168735           | 56.0x               |
| 2010K-0329 | PRJNA168736           | 56.5x               |
| 2010K-0345 | PRJNA168753           | 64.8x               |
| 2010K-0351 | PRJNA168754           | 50.7x               |
| 77-0915    | PRJNA168760           | 60.7x               |
| 76-0331    | PRJNA168759           | 65.2x               |
| 2010K-0284 | PRJNA168728           | 79.8x               |
| 2010K-0287 | PRJNA168730           | 60.2x               |
| 2010K-0297 | PRJNA168731           | 56.2x               |
| 2010K-0300 | PRJNA168732           | 55.6x               |
| 2010K-0302 | PRJNA168733           | 95.5x               |
| 2010K-0303 | PRJNA168734           | 60.5x               |
| 2010K-0268 | PRJNA168750           | 61.0x               |
| 2010K-0301 | PRJNA168752           | 98.3x               |
| 2010K-0271 | PRJNA168727           | 52.6x               |
| 2010K-0286 | PRJNA168729           | 98.2x               |
| 2010K-0264 | PRJNA168749           | 59.2x               |
| 2010K-0262 | PRJNA168725           | 60.5x               |
| 2010K-0267 | PRJNA168726           | 66.2x               |
| 2010K-0263 | PRJNA168748           | 55.7x               |
| 2010K-0277 | PRJNA168751           | 51.9x               |
| 2009K-0477 | PRJNA168745           | 61.9x               |
| 2009K-0479 | PRJNA168746           | 57.9x               |
| 04-0307    | PRJNA168744           | 57.6x               |
| 2009K-1651 | PRJNA168723           | 57.6x               |
| J0903      | PRJNA168762           | 69.2x               |
| J0915      | PRJNA168795           | 56.1x               |

| Isolate       | GenBank accession no. | Sequencing coverage |
|---------------|-----------------------|---------------------|
| 93-6175B      | PRJNA168773           | 95.6x               |
| 93-2836A      | PRJNA168774           | 98.7x               |
| 93-7741       | PRJNA168775           | 93.9x               |
| 93-7922A      | PRJNA168776           | 92.3x               |
| 98-9534       | PRJNA168777           | 99.4x               |
| 02-2966       | PRJNA168778           | 98.7x               |
| 502571        | PRJNA168779           | 98.6x               |
| 0701376-4     | PRJNA168780           | 99.0x               |
| 0804789B      | PRJNA168781           | 98.6x               |
| 0811210F      | PRJNA168782           | 99.1x               |
| 1102933A      | PRJNA168783           | 99.4x               |
| 9810102B      | PRJNA168784           | 99.4x               |
| 54-2220       | PRJNA168739           | 57.2x               |
| 2010K-1554    | PRJNA168757           | 99.4x               |
| 2009K-1324    | PRJNA168747           | 65.0x               |
| 2009K-1726    | PRJNA168724           | 67.6x               |
| 2010K-1923    | PRJNA168737           | 64.6x               |
| 75-2732       | PRJNA168740           | 57.4x               |
| 08-1080       | PRJNA168721           | 96.8x               |
| 84-1226       | PRJNA168741           | 56.4x               |
| 2010K-1028    | PRJNA168755           | 98.6x               |
| 2010K-1832    | PRJNA168758           | 63.3x               |
| 93-0063       | PRJNA168742           | 95.5x               |
| UC02          | PRJNA168785           | 49.8x               |
| UC03          | PRJNA168786           | 55.7x               |
| UC10          | PRJNA168787           | 59.5x               |
| UC11          | PRJNA168788           | 62.4x               |
| UC12          | PRJNA168789           | 56.8x               |
| UC13          | PRJNA168790           | 60.8x               |
| 2009K-0958    | PRJNA168722           | 56.7x               |
| 2010K-1369    | PRJNA168756           | 55.4x               |
| 98-0467       | PRJNA168743           | 49.5x               |
| S-380         | PRJNA168763           | 74.1x               |
| S-277         | PRJNA168765           | 69.7x               |
| 2010K-2029    | PRJNA168738           | 74.7x               |
| J0828         | PRJNA168761           | 66.2x               |
| CDC-STK -1280 | PRJNA168845           | 47.6x               |
| 96-0186       | PRJNA168844           | 54.2x               |
| 2010K-0860    | PRJNA168843           | 56.3x               |
| UC06          | PRJNA168940           | 64.2x               |

Appendix Table 3. Regions flagged as putatively involved in recombination by BratNextGen (Helsinki, Finland) and excluded from analyses

| Region | Start   | Stop    | Locus tags in the reference genome |
|--------|---------|---------|------------------------------------|
| 1      | 1       | 31813   | SEN0001-SEN0027                    |
| 2      | 66159   | 69974   | SEN0057-SEN0061                    |
| 3      | 468453  | 471763  | SEN0418-SEN0420                    |
| 4      | 570412  | 590805  | SEN0509-SEN0530                    |
| 5      | 774386  | 774422  | SEN0697                            |
| 6      | 784432  | 812238  | SEN0706-SEN0732                    |
| 7      | 924608  | 926567  | SEN0841                            |
| 8      | 1000063 | 1044312 | SEN0899-SEN0940                    |
| 9      | 1602387 | 1725731 | SEN1501-SEN1621                    |
| 10     | 1986102 | 2093597 | SEN1881-SEN2005                    |
| 11     | 3402494 | 3402716 | SEN3185                            |
| 12     | 4070069 | 4070244 | SEN_r016                           |
| 13     | 4232858 | 4403391 | SEN3930-SEN4072                    |
| 14     | 4576106 | 4578296 | SEN4254                            |

\*P125109; NCBI reference sequence: NC\_011294.1.

Technical Appendix Table 4. Comparison of 4 models used for phylogenetic analysis\*

|         | Marginal likelihood | Model 1       | Model 2       | Model 3        | Model 4        |
|---------|---------------------|---------------|---------------|----------------|----------------|
| Model 1 | -34183.35           | –             | <b>79.14</b>  | <b>-172.99</b> | <b>-290.17</b> |
| Model 2 | -34262.49           | <b>-79.14</b> | –             | <b>-252.13</b> | <b>-369.31</b> |
| Model 3 | -34010.36           | <b>172.99</b> | <b>252.13</b> | –              | <b>-117.18</b> |
| Model 4 | -33893.18           | <b>290.17</b> | <b>369.31</b> | <b>117.18</b>  | –              |

\*Marginal likelihoods and Bayes factors (in bold) are shown. Model 1: strict clock and constant effective populations size; Model 2: strict clock and Gaussian Markov random field (GMRF) skyride; Model 3: relaxed clock and GMRF skride; Model 4: relaxed clock and constant effective population size. For Bayesian phylogenetic analysis, isolation year of each isolate was used as the tip date to calibrate estimated phylogenetic trees. Three different model combinations were tested: 1) strict molecular clock (applying a constant substitution rate across the entire tree) with constant effective populations size; 2) strict molecular clock with constant effective population size; and 3) lognormal relaxed clock (allowing for different substitution rates on different lineages) with GMRF skyride model; and 4) lognormal relaxed clock with constant effective population size. Every combination was run in 3 independent replicates for 100 million generations each, and model parameters and trees were logged every 10,000 generations. The results of the first 15 million generations (roughly the burn-in for most runs) were discarded. If convergence and proper mixing (as confirmed by Tracer 1.5, <http://tree.bio.ed.ac.uk/software/tracer/>) was achieved for each individual run, the results of the replicate runs were combined for further analysis. For the parameter-rich GMRF model, 5 independent runs of 100 million generations were necessary to obtain proper convergence and mixing. In this case the replicate runs were combined for further analysis. Bayes factors (BF) for each model combination were calculated based on the marginal likelihood values calculated using the path sampling method.

## References

1. Kislyuk AO, Katz LS, Agrawal S, Hagen MS, Conley AB, Jayaraman P, et al. A computational genomics pipeline for prokaryotic sequencing projects. *Bioinformatics*. 2010;26:1819–26. [PubMed http://dx.doi.org/10.1093/bioinformatics/btq284](http://dx.doi.org/10.1093/bioinformatics/btq284)
2. Langmead B, Salzberg SL. Fast gapped-read alignment with Bowtie 2. *Nat Methods*. 2012;9:357–9. [PubMed http://dx.doi.org/10.1038/nmeth.1923](http://dx.doi.org/10.1038/nmeth.1923)
3. Li H, Handsaker B, Wysoker A, Fennell T, Ruan J, Homer N, et al. The Sequence Alignment/Map format and SAMtools. *Bioinformatics*. 2009;25:2078–9. [PubMed http://dx.doi.org/10.1093/bioinformatics/btp352](http://dx.doi.org/10.1093/bioinformatics/btp352)
4. Cock PJ, Antao T, Chang JT, Chapman BA, Cox CJ, Dalke A, et al. Biopython: freely available Python tools for computational molecular biology and bioinformatics. *Bioinformatics*. 2009;25:1422–3. [PubMed http://dx.doi.org/10.1093/bioinformatics/btp163](http://dx.doi.org/10.1093/bioinformatics/btp163)

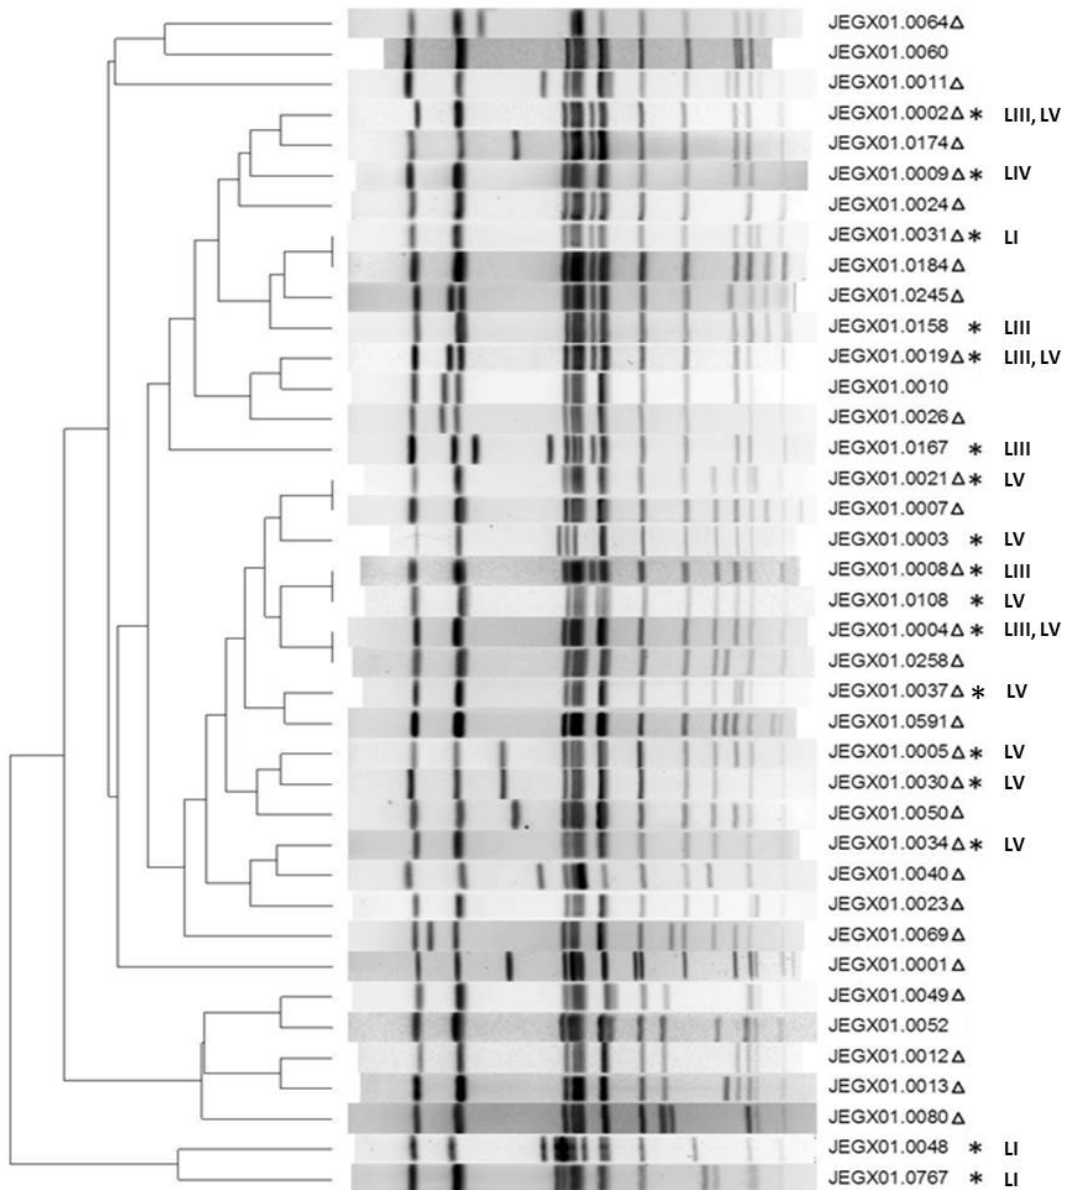

Appendix Figure 1. Dendrogram of top 30 most prevalent *Xba*I pulsed-field gel electrophoresis (PFGE) patterns and patterns selected for sequencing in this study. Δ indicates a top 30 most prevalent pattern. \* indicates a sequenced pattern. Corresponding lineage(s) of each PFGE pattern is labeled.

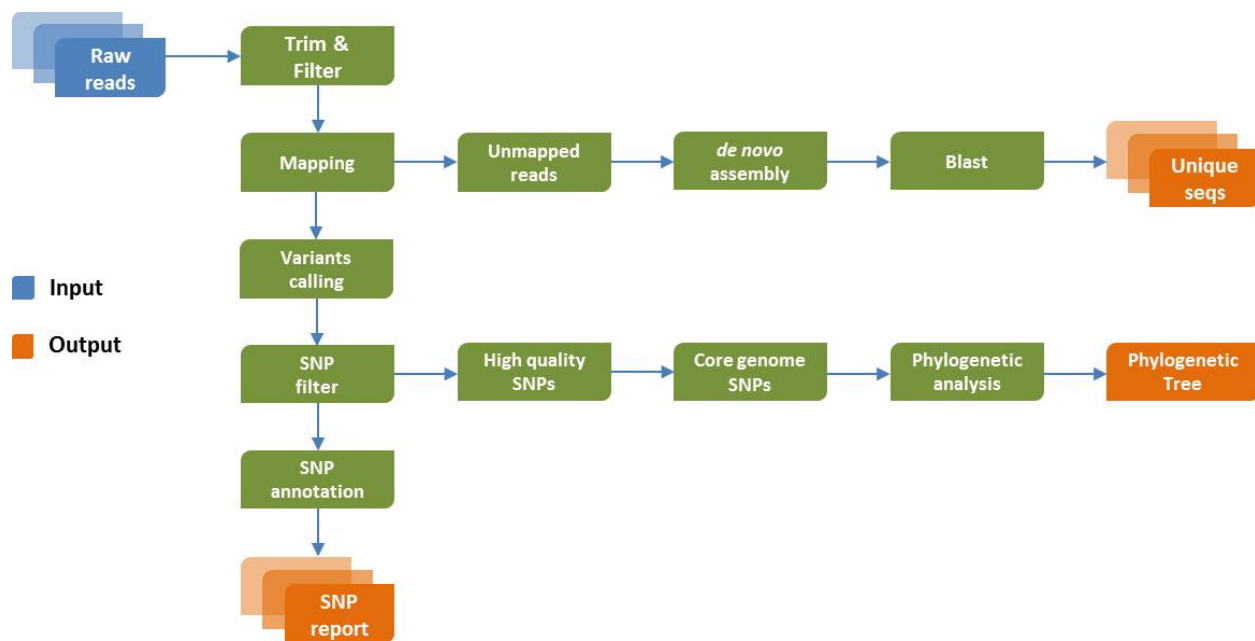

Appendix Figure 2. Bioinformatics pipeline for single-nucleotide polymorphism (SNP) detection. In this study, each raw read in fastq format was trimmed from both ends until whichever of the 2 criteria was met: 1) the end (i.e., the trimmed part) reached an average Phred quality score of 35 or 2) a maximum of 20 bp at each end was removed (1). After trimming, any read below an average Phred score of 30 or a minimum length of 62 bp was removed. Trimmed and filtered reads were then mapped to *Salmonella enterica* serotype Enteritidis reference genome (P125109; NCBI reference sequence: NC\_011294.1) with Bowtie 2 using default settings (2). For genomes sequenced by Illumina ( $n = 81$ ) and 454 ( $n = 44$ ), the average depth of mapping was  $60\times$  and  $14\times$ , respectively. Variants calls (SNPs, insertions and deletions) and consensus sequences were generated from BAM files by using SAMtools Mpileup (3), after BAM file sorting and removal of potential PCR duplicates. For each genome analyzed, a list of high-quality SNPs was derived by subjecting initial SNP calls to a set of quality filters including a minimum Phred base score of 60, a minimum read mapping score of 20, a mapping depth ranging from 5 to 100 reads per locus, a maximum alternate allele percentage of 25% and SNPs were accepted only when confirmed by reads mapped to both the forward and reverse strands. An optional step of SNP annotation was performed to include functional information such as amino acid change if a nonsynonymous point mutation occurred in a coding region. The pipeline was written in Python by using Biopython modules (4). All scripts are available upon request. The program snp-sites was then used to code missing data and SNP sites from ambiguous sites within the consensus sequences and create a multifasta alignment containing variable sites ([https://github.com/andrewjpage/snp\\_sites](https://github.com/andrewjpage/snp_sites)).

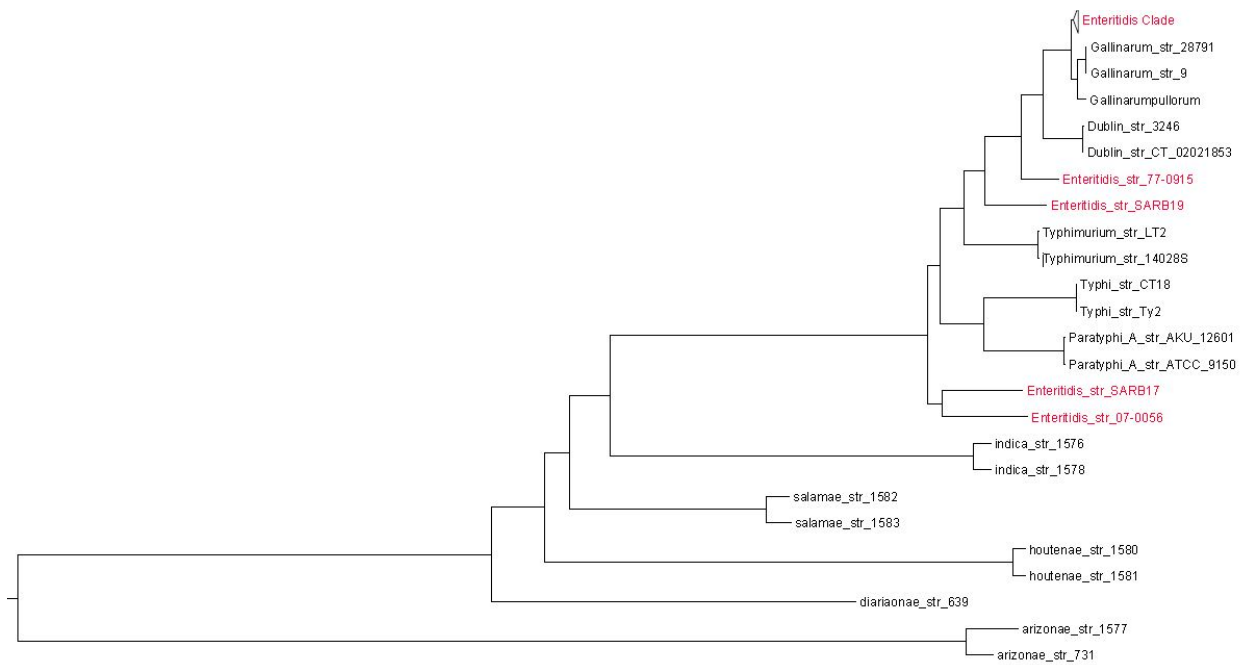

Appendix Figure 3. Core genome single-nucleotide polymorphism maximum likelihood tree of various *Salmonella* serotypes. The main *Salmonella enterica* serotype Enteritidis lineage and the 4 divergent serotype Enteritidis isolates are highlighted in red.



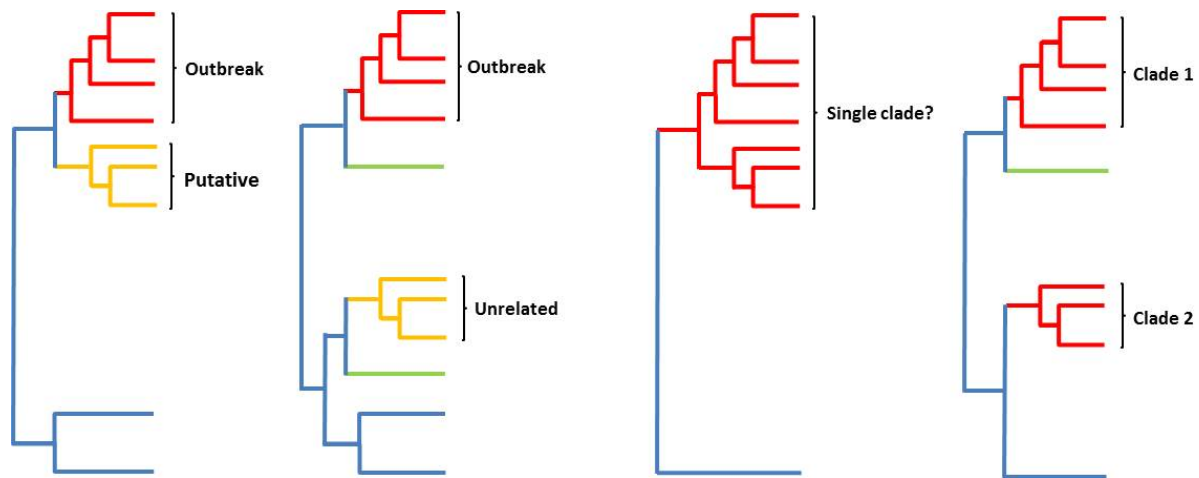

Appendix Figure 4. Importance of reference isolates for whole-genome sequence typing (WGST) outbreak investigation. The outbreak clade is shown in red. Putative and epidemiologically unrelated clades are shown in yellow. Green nodes represent reference isolates. First, the use of proper reference may help exclude isolates that are unrelated to the outbreak under investigation. Without the reference strains highlighted in green in Appendix Figure 4A, the putative outbreak clade highlighted in yellow would cluster with the outbreak clade and appear to be more genetically homogeneous than it actually is. However, with the proper reference strains in place, the yellow clade is most likely a distinct lineage. Second, co-analyzing with a proper set of reference strains can help to separate outbreak isolates into individual clades and uncover multiple sources of contamination in the case of a polyclonal outbreak where multiple strains are simultaneously involved as shown in Appendix Figure 4B. Although phylogeny may help delineate outbreaks, it should not be used as the sole basis for ascribing/excluding isolates to/from an outbreak.
